# Supplementary material
Source: PubMed Central journal article supplement (PMC7346513)
Supplement: jgv-95-384-s001.pdf [file jgv-95-384-s001.pdf]

Supplemental Table 1 (V = virus; S = serum)

| Vaccine Virus | Field Virus | Map Distance |          | Vaccine Virus | Field Virus | Map Distance |      |
|---------------|-------------|--------------|----------|---------------|-------------|--------------|------|
|               |             | V-S          | V-V      |               |             | V-S          | V-V  |
| ERI/3/98      | ARG/81      | 3.42         | 3.86     | IRN/05        | ARG/81      | 1.14         | 2.08 |
|               | BAR02/09    | 3.50         | 4.03     |               | BAR02/09    | 0.32         | 1.20 |
|               | CRUZ/55     | 1.90         | 1.79     |               | CRUZ/55     | 4.64         | 5.58 |
|               | EGY/72      | 2.96         | 3.35     |               | EGY/72      | 1.64         | 2.68 |
|               | EGY01/06    | 1.16         | 1.43     |               | EGY01/06    | 2.77         | 3.76 |
|               | ERI/98      | 0.67         | 0.67     |               | ERI/98      | 3.99         | 3.44 |
|               | ETH09/08    | 2.98         | 2.94     |               | ETH09/08    | 3.95         | 5.02 |
|               | GER/29      | 2.47         | 2.24     |               | GER/29      | 3.90         | 4.87 |
|               | IRN/05      | 4.27         | 4.86     |               | IRN/05      | 1.07         | 1.07 |
|               | IRN/96      | 2.75         | 2.75     |               | IRN/96      | 3.75         | 4.31 |
|               | IRN01/05    | 2.92         | 3.44     |               | IRN01/05    | 0.82         | 1.89 |
|               | IRN07/04    | 3.34         | 3.92     |               | IRN07/04    | 0.54         | 1.37 |
|               | IRN10/03    | 1.13         | 1.59     |               | IRN10/03    | 2.44         | 3.32 |
|               | IRN22/99    | 1.45         | 1.65     |               | IRN22/99    | 3.03         | 4.06 |
|               | IRN23/09    | 3.09         | 3.64     |               | IRN23/09    | 2.72         | 2.72 |
|               | IRN31/05    | 3.12         | 3.70     |               | IRN31/05    | 0.60         | 1.56 |
|               | IRN32/01    | 3.20         | 3.29     |               | IRN32/01    | 3.71         | 4.76 |
|               | IRN36/07    | 3.13         | 3.71     |               | IRN36/07    | 1.77         | 1.78 |
|               | IRN41/03    | 3.10         | 3.50     |               | IRN41/03    | 1.97         | 2.32 |
|               | IRQ/64      | 3.54         | 3.93     |               | IRQ/64      | 1.40         | 2.26 |
|               | IRQ24/09    | 4.10         | 4.63     |               | IRQ24/09    | 1.22         | 0.84 |
|               | KEN/64      | 2.71         | 3.05     |               | KEN/64      | 1.81         | 2.56 |
|               | KEN/65      | 2.85         | 2.57     |               | KEN/65      | 5.14         | 6.18 |
|               | KEN/66      | 2.05         | 2.11     |               | KEN/66      | 3.26         | 4.32 |
|               | KEN01/03    | 4.31         | 4.23     |               | KEN01/03    | 4.58         | 5.58 |
|               | KEN22/09    | 1.68         | 1.59     |               | KEN22/09    | 3.55         | 4.59 |
|               | LAO7/06     | 2.02         | 2.60     |               | LAO7/06     | 3.36         | 3.86 |
|               | LIB14/09    | 3.99         | 4.52     |               | LIB14/09    | 0.90         | 0.88 |
|               | MAI/97      | 1.92         | 2.44     |               | MAI/97      | 3.55         | 4.21 |
|               | NGR/73      | 2.47         | 2.34     |               | NGR/73      | 4.37         | 5.42 |
|               | PAK02/09    | 3.37         | 3.86     |               | PAK02/09    | 0.83         | 1.80 |
|               | PAK23/09    | 3.97         | 4.47     |               | PAK23/09    | 2.74         | 2.44 |
|               | SAU15/05    | 3.67         | 4.26     |               | SAU15/05    | 1.28         | 0.97 |
|               | SUD/77      | 3.62         | 4.00     |               | SUD/77      | 1.99         | 2.23 |
|               | SUD01/06    | 2.93         | 2.76     |               | SUD01/06    | 4.59         | 5.65 |
|               | TAI/60      | 2.52         | 2.22     |               | TAI/60      | 4.46         | 5.51 |
|               | TAI/87      | 2.19         | 1.99     |               | TAI/87      | 3.87         | 4.90 |
|               | TAI01/06    | 2.51         | 3.06     |               | TAI01/06    | 3.09         | 3.31 |
|               | TOG09/05    | 2.82         | 2.69     |               | TOG09/05    | 4.16         | 5.23 |
|               | TUR04/06    | 2.04         | 2.69     |               | TUR04/06    | 1.94         | 2.47 |
| TUR20/06      | 2.53        | 3.13         | TUR20/06 | 2.07          | 2.33        |              |      |
| TUR24/07      | 3.56        | 4.06         | TUR24/07 | 0.56          | 1.39        |              |      |
| UGA/66        | 2.44        | 3.06         | UGA/66   | 2.20          | 2.49        |              |      |
| UK/32         | 4.49        | 4.85         | UK/32    | 4.18          | 3.96        |              |      |
| VIT04/04      | 2.57        | 3.11         | VIT04/04 | 0.92          | 1.94        |              |      |

| Vaccine Virus | Field Virus | Map Distance |          | Vaccine Virus | Field Virus | Map Distance |      |
|---------------|-------------|--------------|----------|---------------|-------------|--------------|------|
|               |             | V-S          | V-V      |               |             | V-S          | V-V  |
| IRN1/96       | ARG/81      | 3.72         | 3.71     | IRQ24/64      | ARG/81      | 0.50         | 0.42 |
|               | BAR02/09    | 3.64         | 3.66     |               | BAR02/09    | 0.93         | 1.12 |
|               | CRUZ/55     | 3.82         | 4.47     |               | CRUZ/55     | 4.65         | 4.57 |
|               | EGY/72      | 3.55         | 3.62     |               | EGY/72      | 1.07         | 0.90 |
|               | EGY01/06    | 2.18         | 2.59     |               | EGY01/06    | 2.55         | 2.53 |
|               | ERI/98      | 2.07         | 4.28     |               | ERI/98      | 3.92         | 3.93 |
|               | ETH09/08    | 4.07         | 2.56     |               | ETH09/08    | 3.32         | 3.12 |
|               | GER/29      | 2.53         | 2.75     |               | GER/29      | 3.15         | 3.07 |
|               | IRN/05      | 4.29         | 4.31     |               | IRN/05      | 2.05         | 2.26 |
|               | IRN/96      | 0.83         | 0.83     |               | IRN/96      | 3.42         | 3.55 |
|               | IRN01/05    | 3.44         | 3.58     |               | IRN01/05    | 1.04         | 1.09 |
|               | IRN07/04    | 3.88         | 4.04     |               | IRN07/04    | 1.49         | 1.59 |
|               | IRN10/03    | 1.79         | 2.25     |               | IRN10/03    | 2.43         | 2.48 |
|               | IRN22/99    | 2.85         | 3.26     |               | IRN22/99    | 2.79         | 2.71 |
|               | IRN23/09    | 2.78         | 3.14     |               | IRN23/09    | 3.51         | 3.73 |
|               | IRN31/05    | 3.70         | 3.88     |               | IRN31/05    | 1.39         | 1.46 |
|               | IRN32/01    | 4.43         | 4.66     |               | IRN32/01    | 3.18         | 2.96 |
|               | IRN36/07    | 2.90         | 3.11     |               | IRN36/07    | 2.60         | 2.83 |
|               | IRN41/03    | 2.21         | 2.04     |               | IRN41/03    | 1.98         | 2.21 |
|               | IRQ/64      | 3.65         | 3.55     |               | IRQ/64      | 0.27         | 0.27 |
|               | IRQ24/09    | 3.75         | 3.66     |               | IRQ24/09    | 1.81         | 2.07 |
|               | KEN/64      | 2.23         | 2.10     |               | KEN/64      | 1.33         | 1.48 |
|               | KEN/65      | 4.39         | 4.84     |               | KEN/65      | 4.80         | 4.66 |
|               | KEN/66      | 3.18         | 3.46     |               | KEN/66      | 2.78         | 2.65 |
|               | KEN01/03    | 4.91         | 4.86     |               | KEN01/03    | 3.62         | 3.39 |
|               | KEN22/09    | 2.74         | 3.07     |               | KEN22/09    | 3.10         | 3.01 |
|               | LAO7/06     | 3.36         | 4.07     |               | LAO7/06     | 4.08         | 4.17 |
|               | LIB14/09    | 3.78         | 3.69     |               | LIB14/09    | 1.36         | 1.61 |
|               | MAI/97      | 3.69         | 4.40     |               | MAI/97      | 4.14         | 4.17 |
|               | NGR/73      | 4.02         | 4.44     |               | NGR/73      | 4.03         | 3.89 |
|               | PAK02/09    | 3.73         | 3.77     |               | PAK02/09    | 0.70         | 0.72 |
|               | PAK23/09    | 3.16         | 3.20     |               | PAK23/09    | 3.40         | 3.66 |
|               | SAU15/05    | 3.55         | 3.66     |               | SAU15/05    | 2.28         | 2.52 |
|               | SUD/77      | 2.69         | 2.38     |               | SUD/77      | 1.82         | 2.07 |
|               | SUD01/06    | 4.30         | 4.64     |               | SUD01/06    | 4.11         | 3.94 |
|               | TAI/60      | 3.50         | 3.76     |               | TAI/60      | 3.87         | 3.74 |
|               | TAI/87      | 2.89         | 3.09     |               | TAI/87      | 3.25         | 3.14 |
|               | TAI01/06    | 2.77         | 3.36     |               | TAI01/06    | 3.87         | 4.04 |
|               | TOG09/05    | 3.92         | 4.15     |               | TOG09/05    | 3.55         | 3.37 |
|               | TUR04/06    | 2.64         | 3.11     |               | TUR04/06    | 2.67         | 2.81 |
| TUR07/08      | 2.96        | 3.50         | TUR07/08 | 2.96          | 3.08        |              |      |
| TUR20/06      | 2.61        | 3.01         | TUR20/06 | 2.86          | 3.05        |              |      |
| TUR24/07      | 3.69        | 3.67         | TUR24/07 | 0.70          | 0.88        |              |      |
| UGA/66        | 2.74        | 3.21         | UGA/66   | 3.03          | 3.21        |              |      |
| UK/32         | 3.26        | 3.29         | UK/32    | 4.69          | 4.94        |              |      |
| VIT04/04      | 3.04        | 3.23         | VIT04/04 | 1.24          | 1.34        |              |      |

| Vaccine Virus | Field Virus | Map Distance |      | Vaccine Virus | Field Virus | Map Distance |      |
|---------------|-------------|--------------|------|---------------|-------------|--------------|------|
|               |             | V-S          | V-V  |               |             | V-S          | V-V  |
| MAI/97        | ARG/81      | 3.67         | 3.87 | IRN/99        | BAR02/09    | 2.36         | 3.03 |
|               | BAR02/09    | 3.48         | 3.76 |               | EGY/72      | 1.62         | 1.94 |
|               | CRUZ/55     | 2.55         | 2.24 |               | ERI/98      | 1.77         | 1.65 |
|               | EGY/72      | 3.38         | 3.52 |               | IRN/05      | 3.35         | 4.06 |
|               | EGY01/06    | 2.50         | 2.54 |               | IRN/96      | 2.64         | 3.26 |
|               | ERI/98      | 2.51         | 2.44 |               | IRN07/04    | 2.31         | 2.86 |
|               | ETH09/08    | 3.99         | 3.89 |               | IRN22/99    | 0.88         | 0.88 |
|               | GER/29      | 4.16         | 4.15 |               | IRN23/09    | 3.10         | 3.86 |
|               | IRN/05      | 3.86         | 4.21 |               | IRN32/01    | 2.39         | 1.77 |
|               | IRN/96      | 4.22         | 4.40 |               | IRQ/64      | 2.19         | 2.71 |
|               | IRN01/05    | 2.96         | 3.19 |               | IRQ24/09    | 3.16         | 3.96 |
|               | IRN07/04    | 2.97         | 3.24 |               | KEN01/03    | 3.39         | 2.98 |
|               | IRN10/03    | 2.28         | 2.42 |               | LIB14/09    | 2.94         | 3.69 |
|               | IRN22/99    | 2.52         | 2.47 |               | MAI/97      | 2.51         | 2.47 |
|               | IRN23/09    | 2.83         | 3.21 |               | PAK02/09    | 2.11         | 2.64 |
|               | IRN31/05    | 2.86         | 3.12 |               | PAK23/09    | 3.66         | 4.52 |
|               | IRN32/01    | 3.87         | 3.77 |               | SUD/77      | 2.74         | 3.58 |
|               | IRN36/07    | 2.92         | 3.30 |               | SUD01/06    | 2.67         | 1.83 |
|               | IRN41/03    | 3.74         | 4.04 |               | TOG09/05    | 2.29         | 1.58 |
|               | IRQ/64      | 3.97         | 4.17 |               | TUR04/06    | 1.83         | 2.49 |
|               | IRQ24/09    | 4.05         | 4.39 | TUR07/08      | 2.01        | 2.54         |      |
|               | KEN/64      | 3.57         | 3.80 | TUR20/06      | 2.35        | 3.10         |      |
|               | KEN/65      | 3.85         | 3.59 | UGA/66        | 2.37        | 3.06         |      |
|               | KEN/66      | 3.17         | 3.11 |               |             |              |      |
|               | KEN01/03    | 5.41         | 5.35 |               |             |              |      |
|               | KEN22/09    | 3.16         | 3.09 |               |             |              |      |
|               | LAO7/06     | 0.57         | 0.87 |               |             |              |      |
|               | LIB14/09    | 4.00         | 4.32 |               |             |              |      |
|               | MAI/97      | 0.41         | 0.41 |               |             |              |      |
|               | NGR/73      | 3.41         | 3.19 |               |             |              |      |
|               | PAK02/09    | 3.47         | 3.69 |               |             |              |      |
|               | PAK23/09    | 3.94         | 4.32 |               |             |              |      |
|               | SAU15/05    | 3.32         | 3.69 |               |             |              |      |
|               | SUD/77      | 4.23         | 4.53 |               |             |              |      |
|               | SUD01/06    | 3.93         | 3.74 |               |             |              |      |
|               | TAI/60      | 3.98         | 3.84 |               |             |              |      |
|               | TAI/87      | 3.75         | 3.69 |               |             |              |      |
|               | TAI01/06    | 1.99         | 2.35 |               |             |              |      |
|               | TOG09/05    | 3.97         | 3.85 |               |             |              |      |
|               | TUR04/06    | 1.69         | 2.05 |               |             |              |      |
| TUR20/06      | 2.26        | 2.64         |      |               |             |              |      |
| TUR24/07      | 3.63        | 3.89         |      |               |             |              |      |
| UGA/66        | 1.97        | 2.36         |      |               |             |              |      |
| UK/32         | 4.69        | 5.04         |      |               |             |              |      |
| VIT04/04      | 2.69        | 2.93         |      |               |             |              |      |



Table 2 Supplement

| Name given  | History of virus               | Propagations carried out | Name given  | History of virus             | Propagations carried out |
|-------------|--------------------------------|--------------------------|-------------|------------------------------|--------------------------|
| ARG/81      | BHK4 e/t                       | RS3                      | KEN/42/66   | GP lymph e/t BTY2            | RS3                      |
| BAR/2/2009  | BTY1 e/t RS1                   | RS2                      | KEN/46/65   | BHK6                         | RS2                      |
| BRA/55      | C7 BHK2 BHK4 BHK1              | RS1                      | LAO/7/2006  | LK2 BHK1 BTY1 e/t            | RS1                      |
| EGY/1/2006  | BTY1 e/t                       | RS1                      | LIB/14/2009 | BTY1 e/t RS1                 | RS2                      |
| EGY/1/72    | BTY1 e/t                       | RS2                      | May-97      | Medial vv #VS12              | RS4                      |
| ERI/98      | Medial vv                      | RS3                      | NGR/2/73    | BTY3 e/t                     | RS2                      |
| ETH/9/2008  | BTY1 e/t RS1                   | RS2                      | PAK/2/2009  | BTY1 e/t RS1                 | RS2                      |
| GER/29      | GP lymph, PP3 e/t BTY BHK3 RS1 | RS2                      | PAK/23/2009 | RS2 e/t RS1                  | RS2                      |
| IRN/05      | BTY1 e/t RS1 BHK4              | RS1                      | POR/01/83   | CK2 e/t                      | RS1                      |
| IRN/1/2005  | BHK1 e/t                       | RS2                      | SAU/15/2005 | BTY1 e/t                     | RS1                      |
| IRN/96      | Medial vv #VS13                | RS2                      | SUD/1/2006  | BTY2 e/t RS1                 | RS2                      |
| IRN/10/2003 | BTY2                           | RS1                      | SUD/3/77    | RS3 e/t                      | RS2                      |
| IRN/99      | Medial vv BTY1 e/t BHK1        | RS4                      | TAI/1/2006  | BHK4 BTY1 e/t BHK1           | RS1                      |
| IRN/23/2009 | BTY1 e/t RS1                   | RS2                      | TAI/118/87  | vv, RS7                      | RS8                      |
| IRN/31/2005 | BTY1 e/t                       | RS1                      | TAI/60      | Medial vv #VS15, RS3         | RS4                      |
| IRN/32/2001 | BTY1 e/t                       | RS1                      | TOG/9/2005  | BTY1 e/t                     | RS1                      |
| IRN/36/2007 | BTY1 e/t RS1                   | RS2                      | TUR/04/2006 | BTY1 e/t RS1                 | RS2                      |
| IRN/41/2003 | BTY1 e/t                       | RS1                      | TUR/20/2006 | BTY1 e/t RS2                 | RS3                      |
| IRN/7/2004  | BTY2 e/t                       | RS1                      | TUR/24/2007 | BTY1 e/t RS2                 | RS3                      |
| IRQ/24/2009 | BTY1 e/t RS1                   | RS2                      | TUR/7/2008  | BTY1 e/t RS1                 | RS2                      |
| IRQ/24/64   | BTY1 BHK15 BHK2                | RS2                      | UGA/13/66   | e/t BTY3 BHK3                | RS2                      |
| KEN/1/2003  | BTY1 e/t                       | RS1                      | UK/32       | Cattle filtered pp3 BTY BHK3 | RS2                      |
| KEN/22/2009 | BTY1 e/t RS1                   | RS2                      | VIT/4/2004  | BTY1 e/t                     | RS1                      |
| KEN/3/64    | GP lymph e/t BTY2              | RS3                      |             |                              |                          |

The following abbreviations were used for the virus history data: BHK = baby hamster kidney cells, BTY = bovine thyroid cells, C = cattle passage, CK = cattle kidney cells, e/t = ether treated, GP lymph = guinea pig lymph, LK = primary lamb kidney cells, PP = plaque picked, RS = renal swine cells and vv = vaccine virus.
